# Supplementary material
Source: PubMed Central journal article supplement (PMC5373107)
Supplement: NIHMS854103-supplement-SI.pdf [file NIHMS854103-supplement-SI.pdf]

**Supporting Information for Long-Range  
Electrostatic Corrections in  
Multipolar/Polarizable QM/MM Simulations**

Eric G. Kratz, Robert E. Duke, and G. Andrés Cisneros\*

*Department of Chemistry, Wayne State University, Detroit, Michigan 48202, USA*

E-mail: [andres@chem.wayne.edu](mailto:andres@chem.wayne.edu)

# 1 LREC convergence tests

The calculations in this section were performed using the QM/MM system described in Section 5.1 of the main paper. All QM calculations were performed at the PBE0/6-31++G(d,p) level of theory.

## 1.1 Convergence with different exponents

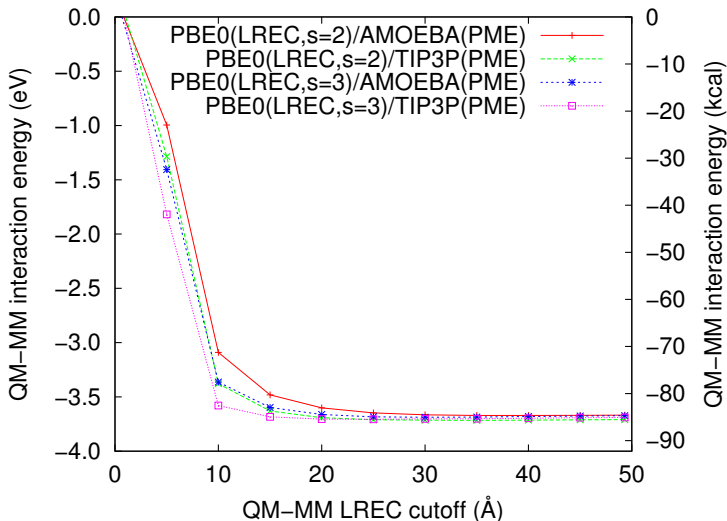

Figure 1: Convergence of PBE0(LREC)/MM(PME) calculations with different exponents and cutoff radii.

Fig. 1 reports the QM-MM interaction energy calculated using different LREC exponents and cutoff radii. Increasing the exponent from  $s=2$  to  $s=3$  accelerates the convergence of both monopolar and multipolar QM(LREC)/MM(PME) calculations and allows the user to decrease the cutoff by approximately 5 Å. Multipolar LREC calculations converge more slowly than the corresponding monopolar LREC calculations when the LREC exponents and number of atoms are equal. If the multipolar QM(LREC)/MM(PME) calculations employ a higher exponent than the monopolar QM(LREC)/MM(PME), then the two sets of QM/MM calculations can converge with the same cutoff radius (20-25 Å). In principle, the exponent could be adjusted to further reduce the cutoff radius and accelerate the QM part of the

calculations. However, a higher exponent and smaller cutoff radius could reintroduce the truncation artifacts that LRE methods are designed to remove.

## 1.2 Raw timings data

**Table 1: Wall time for the PBE0(LREC)/MM(PME) calculations given in Figs. 5 and 6 in the main paper. All calculations were performed on an Intel Core i7 2.67 GHz workstation (8 threads) with LICHEM’s NWChem/TINKER interface.**

| $R_c$ (Å) | Wall time (hours) |        |
|-----------|-------------------|--------|
|           | TIP3P             | AMOEBA |
| 0.2500    | 0.0236            | 0.0308 |
| 5.0000    | 0.0238            | 0.0308 |
| 10.000    | 0.0244            | 0.0341 |
| 15.000    | 0.0258            | 0.0433 |
| 20.000    | 0.0288            | 0.0616 |
| 25.000    | 0.0341            | 0.0927 |
| 30.000    | 0.0416            | 0.1391 |
| 35.000    | 0.0522            | 0.2027 |
| 40.000    | 0.0666            | 0.2911 |
| 45.000    | 0.0847            | 0.3986 |
| 49.323    | 0.1041            | 0.5161 |

Table 1 reports the raw wall time (i.e. the total run time) for the QM(LREC)/MM(PME) calculations. In general, QM/MM calculations with the AMOEBA force field are more expensive than the corresponding TIP3P results. Additionally, the cost of the multipolar QM-QM and QM-MM portions of the calculations increases more rapidly compared to the monopolar results due to the larger number of one-electron integrals. Thus, increasing the exponent can result in a significant decrease in the wall time for QM/MM calculations, and has a larger effect on the efficiency of simulations employing multipolar force fields.
